# Supplementary material
Source: publisher site journal article supplement (https://www.dovepress.com/article/255872)
Supplement: Supplementary file 1 [file get_supplementary_file.php]

# incite

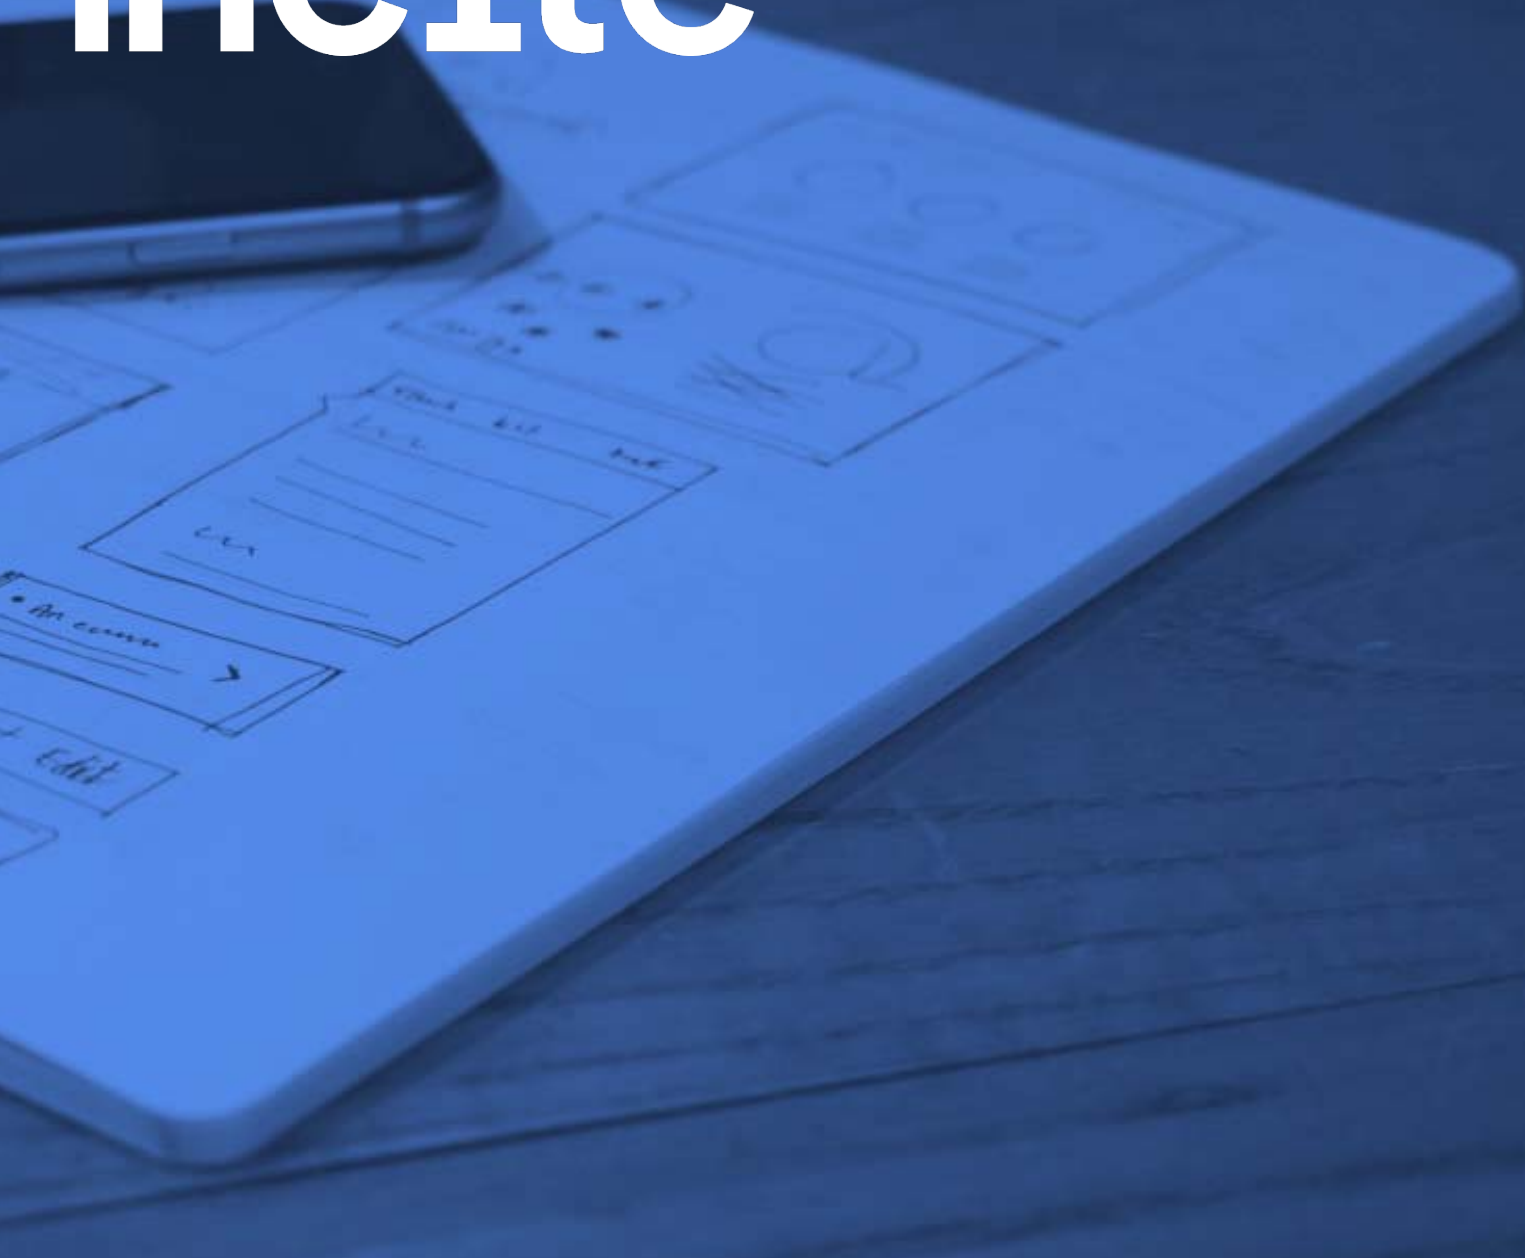

**Sore throat – Global  
U&A**

**Questionnaire**

# Survey Design

## Methodology

30 minute online survey

## Countries (TBC)

|              |       |
|--------------|-------|
| Australia    | N=400 |
| Brazil       | N=400 |
| China        | N=400 |
| France       | N=400 |
| Germany      | N=400 |
| Philippines  | N=400 |
| Russia       | N=400 |
| Saudi Arabia | N=400 |
| Thailand     | N=400 |
| UK           | N=400 |
| USA          | N=400 |
| South Africa | N=400 |
| Italy        | N=400 |

## Target sample

Suffered sore throat or throat dryness in the past 12 months

## Quotas

**Broad Nat rep on Age Gender and SEG**

Text in red provides guidance for programming of the online questionnaire:

- CLOSE**  
End the survey
- CONTINUE**  
Move on to the next question
- CHECK QUOTAS**  
Check if the target number of respondents has been reached for the given demographic
- ROTATE LIST**  
Change the order of the answers in an answer list for each respondent, to avoid answer order bias
- ONE CODE ONLY** 1  
Only one answer permitted from the list
- ASK ALL**  
All respondents to be asked the question
- PIPE IN TREATMENT**  
Insert an answer from a previous question into the next question

# Screeners

We are conducting research about people's experience of sore throat and throat dryness and would like to ask you some questions. The survey will take approximately 30 minutes of your time.

Most importantly, we would like to reassure you that all data generated in this research will remain anonymous at all times and will be treated in accordance with data protection laws. Your name or any other identifiable information will not be mentioned at any time in any of the written reports, connected to any data or disclosed to a third party.

S1. Do you work in any of the following industries?

*Please select all that apply.*

|    |                                                         |                 |
|----|---------------------------------------------------------|-----------------|
| 1  | Market research                                         | <b>CLOSE</b>    |
| 2  | Marketing / Management consulting                       | <b>CLOSE</b>    |
| 3  | Advertising / Public relations                          | <b>CLOSE</b>    |
| 4  | Journalism / Media (TV, radio, newspaper, magazine etc) | <b>CLOSE</b>    |
| 7  | Drugstore / pharmacy                                    | <b>CLOSE</b>    |
| 8  | Manufacturer of healthcare / pharmaceutical products    | <b>CLOSE</b>    |
| 9  | Healthcare / medical professionals                      | <b>CLOSE</b>    |
| 10 | Banking                                                 | <b>CONTINUE</b> |
| 11 | Education                                               | <b>CONTINUE</b> |
| 12 | Telecommunications                                      | <b>CONTINUE</b> |
| 13 | None of the above                                       | <b>CONTINUE</b> |

S2. Are you....?

|   |        |                     |
|---|--------|---------------------|
| 1 | Female | <b>CHECK QUOTAS</b> |
| 2 | Male   | <b>CHECK QUOTAS</b> |

S3. Which of the following age ranges do you fall into?

|   |                |                                                        |    |               |                                              |
|---|----------------|--------------------------------------------------------|----|---------------|----------------------------------------------|
| 1 | Under 18 years | <b>CLOSE<br/>CONTINUE<br/>AND<br/>CHECK<br/>QUOTAS</b> | 9  | 50-54 years   | <b>CONTINUE<br/>AND<br/>CHECK<br/>QUOTAS</b> |
| 2 | 18-19 years    |                                                        | 9  | 50-54 years   |                                              |
| 3 | 20-24 years    |                                                        | 10 | 55-59 years   |                                              |
| 4 | 25-29 years    |                                                        | 11 | 60-64 years   |                                              |
| 5 | 30-34 years    |                                                        | 12 | 65-70 years   |                                              |
| 6 | 35-39 years    |                                                        | 13 | Over 70 years | <b>CLOSE</b>                                 |
| 7 | 40-44 years    |                                                        |    |               |                                              |
| 8 | 45-49 years    |                                                        |    |               |                                              |
| 9 | 50-54 years    |                                                        |    |               |                                              |

S4. Social class/income questions and quotas – see separate document

S5. In which of these regions do you live? – see separate document

S6. In the last 12 months have you suffered from any of the following conditions, even if your condition/degree of suffering was only temporary or extremely mild?

*Please choose all that apply*

**PLEASE ROTATE LIST**

|   |                               |                                                                       |
|---|-------------------------------|-----------------------------------------------------------------------|
| 1 | Headache                      | <b>CLOSE IF NOT<br/>ALSO<br/>MENTIONED<br/>SORE OR DRY<br/>THROAT</b> |
| 2 | Backache                      |                                                                       |
| 3 | Sore throat                   | <b>CONTINUE</b>                                                       |
| 4 | Dry throat                    | <b>CONTINUE</b>                                                       |
| 5 | Dandruff or itchy/flaky scalp | <b>CLOSE IF NOT<br/>ALSO<br/>MENTIONED<br/>SORE OR DRY<br/>THROAT</b> |
| 6 | Sleeplessness                 |                                                                       |
| 7 | Hayfever                      |                                                                       |
| 8 | Headache                      |                                                                       |
|   | None of these                 | <b>CLOSE</b>                                                          |

**Record all drop out details.**

QSY1. How recently have you suffered from a **sore or dry throat**?

**ONE CODE ONLY**

|   |                           |   |
|---|---------------------------|---|
| 1 | Within the past week      | 1 |
| 2 | Within the past month     | 2 |
| 3 | Within the past 3 months  | 3 |
| 4 | Within the past 6 months  | 4 |
| 5 | Within the past 12 months | 5 |

QSY2. How **many times** have you suffered a **sore or dry throat** in the last 12 months?

**ONE CODE ONLY**

|   |                         |   |
|---|-------------------------|---|
| 1 | Never                   | 1 |
| 2 | Once or twice a year    | 2 |
| 3 | 3-4 times a year        | 3 |
| 4 | Every month of the year | 4 |
| 5 | Every week of the year  | 5 |
| 6 | More than once a week   | 6 |

*Now we would like you to think about the most recent time that you had a dry throat or sore throat. Please select all that apply to that occasion.*

QSY3 Did you have any of these other symptoms the most recent time you had a **sore or dry throat**? *Select all that apply.*

**ROTATE LIST**

|    |                                                                     |  |
|----|---------------------------------------------------------------------|--|
| 1  | Dry, tickly cough                                                   |  |
| 2  | Chesty cough                                                        |  |
| 3  | Aches/ pains in the chest or body more generally                    |  |
| 4  | Nasal/sinus congestion                                              |  |
| 5  | Chest congestion                                                    |  |
| 6  | Sneezing                                                            |  |
| 7  | Had to keep clearing my throat                                      |  |
| 8  | Other flu like symptoms eg Fever, temperature, no energy, lethargic |  |
| 9  | Loss of voice                                                       |  |
| 10 | None of these                                                       |  |

Still thinking about **the most recent time** that you had a sore and/or dry throat.

QSY4. Thinking about the most recent time you suffered a sore or dry throat approximately how long did your symptoms last?

**ONE CODE ONLY**

|   |                   |   |
|---|-------------------|---|
| 1 | Less than one day | 1 |
| 2 | One day           | 2 |
| 3 | Two-three days    | 3 |
| 4 | Four-five days    | 4 |
| 5 | Six-seven days    | 5 |
| 6 | More than a week  | 6 |

QSY5. Do you know, or think you know, what caused or led to the sore or dry throat that you had most recently?

**ONE CODE ONLY**

|   |                                                                  |                  |
|---|------------------------------------------------------------------|------------------|
| 1 | I know for sure what caused it                                   | <b>ASK SY6</b>   |
| 2 | I think I know what caused it/ I have a good idea what caused it | <b>ASK SY6</b>   |
| 3 | I have no idea what caused it                                    | <b>GO TO SY7</b> |

QSY6. What was it that (**INSERT CAUSED/ YOU THINK CAUSED FROM QSY5**) your most recent sore or dry throat symptoms?

*Please select all that apply.*

**PLEASE ROTATE LIST**

|    |                                                 |               |
|----|-------------------------------------------------|---------------|
| 1  | Common cold/flu                                 | MEDICAL       |
| 2  | Other bacterial or viral infection              | MEDICAL       |
| 3  | Hayfever                                        | ENVIRONMENTAL |
| 4  | Specific allergy (excluding hayfever)           | ENVIRONMENTAL |
| 5  | Too much talking/shouting/singing               | ENVIRONMENTAL |
| 6  | General airborne pollution                      | ENVIRONMENTAL |
| 7  | Dust or other specific environmental conditions | ENVIRONMENTAL |
| 8  | Smoking/Passive smoking                         | ENVIRONMENTAL |
| 9  | Being in a crowded place                        | ENVIRONMENTAL |
| 10 | Drinking too much alcohol the night before      | ENVIRONMENTAL |
| 11 | Hot and dry indoor environment                  | ENVIRONMENTAL |
| 12 | Air conditioning                                | ENVIRONMENTAL |
| 13 | Sudden changes in temperature/weather           | MEDICAL       |
| 14 | Snoring                                         | ENVIRONMENTAL |
| 16 | Cold or cold and wet weather                    | MEDICAL       |

|    |                                      |               |
|----|--------------------------------------|---------------|
| 17 | A change in seasons                  | MEDICAL       |
| 18 | Hot /Humid / Dry weather             | ENVIRONMENTAL |
| 19 | Got it from a child or family member | ENVIRONMENTAL |
| 20 | Stress at home/work                  | MEDICAL       |
| 21 | Lack of sleep/ tiredness             | MEDICAL       |
| 22 | Another cause (please write in)      | ENVIRONMENTAL |

**ASK ALL**

QSY7. How important is it to you to know the cause of your throat symptoms?

**ONE CODE ONLY**

|   |                      |  |
|---|----------------------|--|
| 1 | Not at all important |  |
| 2 | Not very important   |  |
| 3 | Fairly important     |  |
| 4 | Very important       |  |

QSY8. How would you describe the severity of the sore or dry throat that you suffered most recently?

Very mild

Very severe

|   |   |   |   |   |   |   |   |   |    |
|---|---|---|---|---|---|---|---|---|----|
| 1 | 2 | 3 | 4 | 5 | 6 | 7 | 8 | 9 | 10 |
|---|---|---|---|---|---|---|---|---|----|

QSY9. Which of these describe how it felt physically when you had your most recent sore or dry throat?

*Please select all that apply*

**PLEASE ROTATE LIST**

|    |                                              |  |
|----|----------------------------------------------|--|
| 1  | Tickly                                       |  |
| 2  | Scratchy                                     |  |
| 3  | Itchy                                        |  |
| 4  | Dry                                          |  |
| 5  | Husky                                        |  |
| 6  | Irritated                                    |  |
| 7  | Prickly                                      |  |
| 8  | Swollen                                      |  |
| 9  | Tight                                        |  |
| 10 | Hard to swallow                              |  |
| 11 | Stabbing sharp pain                          |  |
| 1  | Burning                                      |  |
| 13 | Lump in throat                               |  |
| 14 | Cut throat                                   |  |
| 15 | Painful to talk                              |  |
| 16 | Like I've swallowed barbed wire/broken glass |  |
| 17 | Inflamed                                     |  |

|    |                                  |  |
|----|----------------------------------|--|
| 18 | Raw                              |  |
| 19 | Something else (please write in) |  |

QSY10. Which of these describe how it made you feel emotionally when you had your most recent sore or dry throat?

*Please select all that apply.*

|    |                                                    |  |
|----|----------------------------------------------------|--|
| 1  | Miserable/Fed up                                   |  |
| 2  | Isolated / cut off                                 |  |
| 3  | Really Sad                                         |  |
| 4  | No interest in socialising with friends and family |  |
| 5  | It reduced my appetite.                            |  |
| 6  | Couldn't concentrate                               |  |
| 7  | Distracted                                         |  |
| 8  | Agitated                                           |  |
| 9  | Didn't feel like myself                            |  |
| 10 | Self-conscious when talking to people              |  |

QSY11. Which of these applied to your most recent sore or dry throat? My throat symptoms were ...

**ONE CODE ONLY**

|   |                                      |  |
|---|--------------------------------------|--|
| 1 | Consistent through the day and night |  |
| 2 | Worse during the morning             |  |
| 3 | Worse during the afternoon           |  |
| 4 | Worse during the evening             |  |
| 5 | Worse during the night               |  |
| 6 | It varied day by day                 |  |

*Thank you for your responses so far. We would like you to continue to think about the most recent sore or dry throat you suffered from.*

QT1. Thinking about the most recent time you suffered with your throat did you do anything at all to treat it or help deal with the symptoms?

**ONE CODE ONLY**

|   |     |  |
|---|-----|--|
| 1 | Yes |  |
| 2 | No  |  |

**ASK ALL**

QT2. And thinking about previous times that you have experienced SIMILAR throat symptoms, how often did you do something to treat it?



**ONE CODE ONLY**

|   |                                           |  |
|---|-------------------------------------------|--|
| 1 | Always                                    |  |
| 2 | Often                                     |  |
| 3 | Sometimes                                 |  |
| 4 | Never                                     |  |
| 5 | I haven't suffered throat symptoms before |  |

**ASK ALL WHO TREATED AT QT1 (CODE 1) IF NOT TREATED AT ALL (CODE2)  
SKIP TO QT10**

QT3. On this occasion how long was it from when you first started to notice your throat symptoms to when you started to do something to treat them?

**ONE CODE ONLY**

|   |                       |  |
|---|-----------------------|--|
| 1 | within an hour        |  |
| 2 | within half a day     |  |
| 3 | within a day          |  |
| 4 | two or three days     |  |
| 5 | within a week         |  |
| 6 | within two weeks      |  |
| 7 | longer than two weeks |  |

QT4. Thinking about the throat symptoms you had most recently, what was it that made you do something about it?

*Please select all that apply.*

|    |                                                          |  |
|----|----------------------------------------------------------|--|
| 1  | I didn't want the symptoms to get worse                  |  |
| 2  | The symptoms interfered with my day to day activities    |  |
| 3  | I didn't want <u>new</u> symptoms to start               |  |
| 4  | The symptoms had got worse                               |  |
| 5  | The symptoms interfered with sleep                       |  |
| 6  | The symptoms were agonizing                              |  |
| 7  | Although not agonizing the symptoms were very unpleasant |  |
| 8  | the symptoms were not going away                         |  |
| 9  | I was advised by doctor/nurse                            |  |
| 10 | I was advised by Pharmacist/ pharmacist assistant        |  |
| 11 | I was advised by Family/friends                          |  |
| 12 | Something else (please write in)                         |  |

QT5a. Which of these did you use or do for the throat symptoms you experienced most recently?

*Please select all that apply.*

**PLEASE ROTATE. IF MORE THAN ONE USED AT QT5a.ASK:**

QT5b. And which of these treatments did you use first?

QT5c. And which second?

QT5d. and which third

QT5e and which would you say was your MAIN treatment? **ONE CODE ONLY**

|   |                                    | Use at all | Use first | Use second | Use Third | Main treatment |
|---|------------------------------------|------------|-----------|------------|-----------|----------------|
| 1 | Antibiotics                        |            |           |            |           |                |
| 2 | Medicated sore throat remedies     |            |           |            |           |                |
| 3 | Prescription treatment             |            |           |            |           |                |
| 4 | Natural/alternative treatment      |            |           |            |           |                |
| 5 | Home remedies                      |            |           |            |           |                |
| 6 | Analgesics/Pain killers            |            |           |            |           |                |
| 7 | Drinking water/ fluids             |            |           |            |           |                |
| 8 | Confectionary, sweets, chewing gum |            |           |            |           |                |

QT6a.Thinking about ALL the things you used which of these statements BEST applies to how you used them?

**ONE CODE ONLY**

|  |                                                          |  |
|--|----------------------------------------------------------|--|
|  | I used the same treatments during both the day and night |  |
|  | I used different treatments during the day than at night |  |
|  | I only used treatments at all during the day             |  |
|  | I only used treatments at all during the night           |  |
|  | It varied                                                |  |

**ASK ALL WHO USED MORE THAN ONE TREATMENT AT QT5a**

QT6b. Still thinking about ALL the things you used for your most recent throat symptoms which of these next statements BEST applies to how you used them? **ONE CODE ONLY**

|  |                                                                               |  |
|--|-------------------------------------------------------------------------------|--|
|  | I used the same ONE treatment all the way through                             |  |
|  | I used several treatments all the way through                                 |  |
|  | I changed the treatments I was using during the course of the sore/dry throat |  |

**ASK ALL WHO USED MORE THAN ONE TREATMENT AT QT5a**

**FOR EACH USED AT QT5(a-d) ASK:**

QT7. When during the episode of a sore or dry throat did you use/do this?

**ONE CODE ONLY**

|                         | Antibiotics | Medicated sore throat remedies | Prescription treatment | Natural alternatives | Home remedies | Drinking / fluids | Sweets |
|-------------------------|-------------|--------------------------------|------------------------|----------------------|---------------|-------------------|--------|
| Mostly at the beginning |             |                                |                        |                      |               |                   |        |
| All the way through     |             |                                |                        |                      |               |                   |        |
| Mostly at the end       |             |                                |                        |                      |               |                   |        |

**QT8 TO BE ASKED ABOUT MAIN TREATMENT FROM QT5e AND up to 2 other treatments randomly selected from QT5a. PIPE IN TREATMENT BELOW QUESTION WORDING AT QT8.**

QT8. ~~Thinking now about (MAIN TREATMENT AUTO-FILL)~~ Which of these were important to you when choosing which treatment to use? Which of these were important to you when choosing this treatment shown below?

*Please select all that apply.*

I wanted something which....

**PLEASE ROTATE WITHIN LISTS AND KEEP LISTS SEPARATE.**

|   | <b>LIST ONE</b>     |
|---|---------------------|
| 1 | Soothes the throat  |
| 2 | Coats the throat    |
| 4 | Relieves pain       |
| 5 | Moistens the throat |
| 7 | Treats infection    |

|    |                                         |
|----|-----------------------------------------|
| 8  | Cleanses the throat                     |
| 9  | Numbs the throat                        |
|    | <b>LIST TWO</b>                         |
| 10 | I could feel working                    |
| 11 | Works quickly                           |
| 12 | Gives long lasting relief               |
| 13 | Contains natural ingredients            |
| 14 | Has a pleasant taste/ flavour           |
| 15 | Was not expensive                       |
| 16 | Does not react with other medicines     |
| 17 | Other members of my family can take     |
| 18 | Healthcare professionals recommend      |
| 19 | Comes in a format I like                |
| 20 | Contains the active ingredient I prefer |
| 21 | Is a brand I trust                      |
| 22 | It has worked for me before             |

**ASK ALL SUFFERING FROM SORE/DRY THROAT AT s6 (code 3/4) AND WHO TREATED AT ALL AT QT1 AND WHO DID NOT USE MEDICATED SORE THROAT REMEDIES (did NOT code 2 at QT5a), ASK QT9a.**

QT9a For what reason/s didn't you use Medicated sore throat remedies for your most recent sore throat symptoms?

*Please choose all that apply.*

**PLEASE ROTATE STATEMENTS**

|    |                                                                  |
|----|------------------------------------------------------------------|
| 1  | advice from internet or other people                             |
| 3  | I was recovering/ would recover/ it would pass quickly           |
| 4  | The symptoms were too severe for over-the-counter                |
| 5  | Other treatments were (more) effective                           |
| 6  | I was advised to use something else by a healthcare professional |
| 7  | I prefer not to use medications generally                        |
| 8  | Symptoms were not bad enough/ disruptive enough                  |
| 9  | I don't think these work for this sort of problem                |
| 10 | Some other reason (please write in)                              |

**ASK ALL SUFFERING FROM SORE OR DRY THROAT AT s6 (code 3/4) AND WHO TREATED AT ALL AT QT1 AND WHO DID NOT USE OTHER MEDICINAL PRODUCTS (prescription and/or antibiotics at QT5a) AT ALL AT QT5a. (But could have selected 'medicated sore throat remedies' at QT5a).**

QT9b For what reason/s didn't you use other medicinal treatments (prescription treatment or antibiotics) for your most recent sore throat symptoms?

*Please choose all that apply.*

**PLEASE ROTATE STATEMENTS**

|    |                                                                  |
|----|------------------------------------------------------------------|
| 1  | advice from internet or other people                             |
| 3  | I was recovering/ would recover/ it would pass quickly           |
| 4  | The symptoms were not severe enough for medicinal products       |
| 5  | Other treatments were (more) effective                           |
| 6  | I was advised to use something else by a healthcare professional |
| 7  | I prefer not to use medications generally                        |
| 8  | Symptoms were not bad enough/ disruptive enough                  |
| 9  | I don't think these work for this sort of problem                |
| 10 | Some other reason (please write in)                              |

**ASK ALL WHO DID NOT TREAT AT QT1 OTHERWISE SKIP TO QIN1**

QT10 Why didn't you treat your sore /dry throat?

*Please choose all that apply.*

|   |                                                        |  |
|---|--------------------------------------------------------|--|
| 1 | I was recovering/ would recover/ it would pass quickly |  |
| 2 | Symptoms were not bad enough/ disruptive enough        |  |
| 3 | I don't think treatments work                          |  |
| 4 | I couldn't be bothered to treat it                     |  |
| 5 | I prefer not to use medications generally              |  |
| 6 | None of these reasons                                  |  |

**ASK ALL**

*Thank you for your answers so far.*

QIN1. Which of these, if any, did you go to for advice when you experienced your most recent throat symptoms?

*Please choose all that apply*

|   |                                                  |  |
|---|--------------------------------------------------|--|
| 1 | GP/doctor                                        |  |
| 2 | Specialist doctor/consultant                     |  |
| 3 | Pharmacist                                       |  |
| 4 | Pharmacy assistant                               |  |
| 5 | looked online by searching my symptoms           |  |
| 6 | Looked on a health website                       |  |
| 7 | Got information from TV, magazines or newspapers |  |
| 8 | Friends and/or family                            |  |

|    |                         |                 |
|----|-------------------------|-----------------|
| 9  | Other (please write in) |                 |
| 10 | None                    | Skip to<br>QIN6 |

**ASK IF MORE THAN ONE HCP SEEN (CODE 1,2,3,4 AT QIN1.)**

QIN2a. You mentioned that you had seen **(insert HCP type coded 1-4 from QIN1)** when you experienced your most recent throat symptoms?

Which of the healthcare professionals did you go to for advice first?

QIN2b And which did ask for advice second?

QIN2c. And third?

QIN2d. And fourth?

*Please choose all that apply*

|   |                              | First | second | Third | Fourth |
|---|------------------------------|-------|--------|-------|--------|
| 1 | GP/doctor                    |       |        |       |        |
| 2 | Specialist doctor/consultant |       |        |       |        |
| 3 | Pharmacist                   |       |        |       |        |
| 4 | Pharmacy assistant           |       |        |       |        |

**ASK QIN3 IF SEEN PHARMACIST OR PHARMACY ASSISTANT (CODES 3 OR 4 AT QIN1.) IF NOT SEEN SKIP TO QIN6**

QIN3 When you saw the pharmacist or pharmacy assistant did they.....?

**ONE CODE ONLY**

|   |                                                      |                    |
|---|------------------------------------------------------|--------------------|
| 1 | Recommend something to you which you bought/used     | <b>Ask QIN4</b>    |
| 2 | Recommend something to you but you didn't buy/use it | <b>ASK QIN5a/7</b> |
| 3 | Not recommend anything to you                        | <b>ASK QIN5a/7</b> |

**ASK IF SEEN PHARMACIST OR PHARMACY ASSISTANT (CODES 3 OR 4 AT QIN1) AND CODED 1 AT QIN3, OTHERWISE SKIP TO QIN6**

QIN4. What did the pharmacist/pharmacy assistant recommend?

*Please choose all that apply*

|   |                                                |  |
|---|------------------------------------------------|--|
| 1 | Antibiotics                                    |  |
| 2 | Medicated sore throat remedies                 |  |
| 3 | Prescription treatment                         |  |
| 4 | Natural/alternative over the counter treatment |  |
| 6 | Home remedies                                  |  |
| 9 | Confectionary, sweets, chewing gum             |  |

**SHOW EACH PRODUCT RECOMMENDED AT QIN4**

QIN5. On this occasion where did you buy/get this product?

|   |                                               | Antibiotics | Medicated sore throat remedies | Prescription |
|---|-----------------------------------------------|-------------|--------------------------------|--------------|
| 1 | Online                                        |             |                                |              |
| 2 | At my Drs surgery/from my healthcare provider |             |                                |              |
| 3 | At the pharmacy                               |             |                                |              |
| 4 | At the Drugstore                              |             |                                |              |
| 5 | From a general supermarket /convenience store |             |                                |              |
| 6 | Did not buy it – had it already               |             |                                |              |
| 7 | Other                                         |             |                                |              |

**ASK IF SEEN DOCTOR AT QIN1. OTHERWISE SKIP TO QIN6/7**

**QIN5a** How strongly do you agree or disagree with the following statements about why you visit your doctor?

|                                                       |  |  |  |  |
|-------------------------------------------------------|--|--|--|--|
|                                                       |  |  |  |  |
| I want to be examined for the cause of my sore throat |  |  |  |  |
| I want Dr to give me something for pain               |  |  |  |  |
| I want Dr to explain how serious my problem is        |  |  |  |  |
| I want to know how soon I will recover                |  |  |  |  |
| I want Dr to explain possible treatments              |  |  |  |  |
| I feel anxious and would like Dr's help               |  |  |  |  |
| I want a note for sick leave for work                 |  |  |  |  |
| I want an antibiotic                                  |  |  |  |  |
| I want to be referred to a specialist                 |  |  |  |  |



**ASK ALL WHO DID NOT CONSULT ANY HCP AT QIN1.**

QIN6. which of these reasons applies to why on this occasion you did not go to see a healthcare professional about your sore or dry throat

*Please choose all that apply*

|   |                                                                              |  |
|---|------------------------------------------------------------------------------|--|
| 1 | I have been to see them with this problem before and do not need to go again |  |
| 2 | It was not serious enough to see a healthcare professional                   |  |
| 3 | It would be too inconvenient                                                 |  |
| 4 | It would have been too expensive                                             |  |
| 5 | There is nothing they can do for this sort of problem.                       |  |
| 6 | I don't think it's a health problem.                                         |  |
| 7 | Another reason                                                               |  |

**ASK ALL**

QIN7. Thinking now about pharmacist/pharmacy assistants how strongly do you agree or disagree with the following statements?

*Please choose all that apply*

|                                                                                              | Disagree strongly | Disagree | Neither agree or disagree | Agree | Agree strongly |
|----------------------------------------------------------------------------------------------|-------------------|----------|---------------------------|-------|----------------|
| They are more interested than the doctor in problems like a sore or dry throat.              |                   |          |                           |       |                |
| I believe what they tell me                                                                  |                   |          |                           |       |                |
| I would trust a brand more if it was recommended to me by a pharmacist or pharmacy assistant |                   |          |                           |       |                |
| I value the advice of the pharmacist or pharmacy assistant                                   |                   |          |                           |       |                |
| They can tell me the cause of a sore/dry throat                                              |                   |          |                           |       |                |
| They can tell me if I need to go to the Doctor.                                              |                   |          |                           |       |                |

**ASK ALL**

QB1a. Now we would like you to think about some brands that people may use for a sore or dry throat. Which of these brands have you heard of? *Please choose all that apply* **IF RESPONDENT SELECTS 'NONE', SKIP TO QB4.**

QB1b. Which of these brands have you personally used at all in the last 12 months? *Please choose all that apply* **IF SELECT 'NONE', SKIP TO QB1E.**

**ASKQB1c ONLY IF TREATMENT USED AT QT1 (CODE 1)**

QB1c. Which, if any, did you use last time you had a sore/dry throat? *Please choose all that apply*

**ASK ALL**

QB1d. Which ONE do you use most often?

**ONE CODE ONLY**

**ASK FOR ALL AWARE OF (@QB1a) BUT NOT USED IN PAST 12 MONTHS (@QB1b):**

QB1e. Which of these would you consider using in the future?

*Please choose all that apply*

|   |                                                        | Aware | Used AT ALL 12 months | Used LAST TIME | Used MOST OFTEN | Would consider |
|---|--------------------------------------------------------|-------|-----------------------|----------------|-----------------|----------------|
| 1 | See separate document for Brand lists for each country |       |                       |                |                 |                |
| 2 |                                                        |       |                       |                |                 |                |
| 3 |                                                        |       |                       |                |                 |                |
| 4 |                                                        |       |                       |                |                 |                |

**ASK FOR BRANDS AWARE OF AT QB1a**

QB2. Here is a list of statements that some people have used to describe brands. Which of these statements would you associate with each of these brands?

*It doesn't matter if you don't know the brand well, it is your impressions we are interested in, you can choose as many or as few statements as you like.*

|                                            | TBC |  |  |  |  |  |  |
|--------------------------------------------|-----|--|--|--|--|--|--|
| You can feel it working                    |     |  |  |  |  |  |  |
| It works quickly                           |     |  |  |  |  |  |  |
| It gives long lasting relief               |     |  |  |  |  |  |  |
| It contains natural ingredients            |     |  |  |  |  |  |  |
| It has a pleasant taste/ flavour           |     |  |  |  |  |  |  |
| It is not expensive                        |     |  |  |  |  |  |  |
| It does not react with other medicines     |     |  |  |  |  |  |  |
| Other members of my family can take it too |     |  |  |  |  |  |  |
| Healthcare professionals recommend it      |     |  |  |  |  |  |  |
| Comes in a format I like                   |     |  |  |  |  |  |  |
| Contains the active ingredient I prefer    |     |  |  |  |  |  |  |
| Is a brand I trust                         |     |  |  |  |  |  |  |
| It a brand which has worked for me before  |     |  |  |  |  |  |  |

**ASK QB3 FOR ALL BRANDS USED LAST TIME (QB1c) : ROTATE ORDER OF BRANDS IF NO BRANDS USED SKIP TO QB4**

QB3. You said you have used **[BRAND/S]** on the most recent occasion you treated a dry or sore throat what format did this/these brand/s come in?

*Please choose all that apply.*

|   |                                 | Brand 1 | Brand 2 | Brand 3 |
|---|---------------------------------|---------|---------|---------|
| 1 | Suckable tablets                |         |         |         |
| 2 | Liquid/Gargle                   |         |         |         |
| 3 | Lozenges                        |         |         |         |
| 4 | Solubles (in water) eg Granules |         |         |         |
| 5 | Sprays                          |         |         |         |

QB4 Now we would like you to think about the formats that throat remedies come in which of these statements apply to each format. It doesn't matter if you don't know the format well, it is your impressions we are interested in, you can choose as many or as few statements as you like.

*Please choose all that apply.*

|                                                   | Suckable tablets | Liquid/Gargle | Lozenges | Solubles (in water) eg Granules | Sprays |
|---------------------------------------------------|------------------|---------------|----------|---------------------------------|--------|
| Is best for really severe sore throat             |                  |               |          |                                 |        |
| Is most soothing                                  |                  |               |          |                                 |        |
| Is best for regular use                           |                  |               |          |                                 |        |
| Works the fastest                                 |                  |               |          |                                 |        |
| Is best for moisturising the throat               |                  |               |          |                                 |        |
| Is pleasant to use                                |                  |               |          |                                 |        |
| Lasts the longest                                 |                  |               |          |                                 |        |
| Is best to use for a dry or irritated throat      |                  |               |          |                                 |        |
| Is best for a moderately sore throat              |                  |               |          |                                 |        |
| Is best for the early stages of a sore throat     |                  |               |          |                                 |        |
| Is best for keeping your throat generally healthy |                  |               |          |                                 |        |
| Comes in flavours I like                          |                  |               |          |                                 |        |
| Is the easiest to use                             |                  |               |          |                                 |        |

**ASK ALL**

*Thank you for your answers so far, we have just a couple more questions for you.*  
 QAH1 How strongly do you agree or disagree with the following statements about Antibiotics?

|                                                                              | Disagree strongly |   |   |   | Agree strongly |
|------------------------------------------------------------------------------|-------------------|---|---|---|----------------|
| Antibiotics are generally effective against sore throats                     | 1                 | 2 | 3 | 4 | 5              |
| Unnecessary use of antibiotics makes them become ineffective                 |                   |   |   |   |                |
| Antibiotics speed up recovery                                                |                   |   |   |   |                |
| Antibiotics prevent a sore throat turning into something worse               |                   |   |   |   |                |
| I only use antibiotics if I absolutely have to                               |                   |   |   |   |                |
| I like to use antibiotics straight away to prevent my symptoms getting worse |                   |   |   |   |                |

Check with panel if recorded elsewhere also children

Q. Finally, which of the following best describes your employment status?

Please select one answer only

|                              |
|------------------------------|
| Full-time                    |
| Part-time                    |
| Student                      |
| Retired                      |
| Not employed                 |
| Other (please specify) _____ |
